# Supplementary material for: Self-Maintaining CD103+ Cancer-Specific T Cells Are Highly Energetic with Rapid Cytotoxic and Effector Responses
Source: Oxford University Press journal article supplement (doi:10.1158/2326-6066.cir-19-0554), 2019-11-26
Supplement: 23266066cir190554-sup-225893_3_supp_5904424_q10z37.docx [file 23266066cir190554-sup-225893_3_supp_5904424_q10z37.docx]

**Supplementary Movies Titles and Legends**

**Supplementary Movie S1. CD103+ T cells killing of HCT116 cancer cells, in brightfield imaging. Magnification used at 10X air objective. Real live cells imaging at brightfield stage. T cells identified as the small moving cells, while HCT116 identified as the immobile, large cells, being killed. Killing event identified by bursting/bubbling of the cell membrane of the immobile cell.**

**Supplementary Move S2. CD103+ T cells killing of HCT116 cancer cells, by calcium influx imaging. Magnification used at 10X air objective. Flou4-AM dye staining was performed indicated as red, which fluorescent upon calcium influx occur. Calcium influx occur upon T cell engagement with HCT116 cells, indicating killing.**

**Supplementary Movie S1. CD103- T cells killing of HCT116 cancer cells, in brightfield imaging. Magnification used at 10X air objective. Real live cells imaging at brightfield stage. T cells identified as the small moving cells, while HCT116 identified as the immobile, large cells, being killed. Killing event identified by bursting/bubbling of the cell membrane of the immobile cell.**

**Supplementary Move S2. CD103- T cells killing of HCT116 cancer cells, by calcium influx imaging. Magnification used at 10X air objective. Flou4-AM dye staining was performed indicated as red, which fluorescent upon calcium influx occur. Calcium influx occur upon T cell engagement with HCT116 cells, indicating killing.**
